# Supplementary material
Source: Research Square preprint supplement (doi:10.21203/rs.3.rs-9818295/v1)
Supplement: Supplementary file 1 [file 3601e998eefa0fc511735fa4.pdf]

## CARE Checklist for Case Reports

For manuscript: **“Guillain-Barré Syndrome (AIDP Variant) Temporally Associated With Purified Vero Cell Rabies Vaccination (Rabivax-S) in a 23-Year-Old Male: A Case Report”**

| Topic     | Item # | Checklist Item Description                                                                                                                            | Reported Page Number/Line Number | Reported on Section/Paragraph |
|-----------|--------|-------------------------------------------------------------------------------------------------------------------------------------------------------|----------------------------------|-------------------------------|
| Title     | 1      | The diagnosis or intervention of primary focus followed by the words "case report"                                                                    | Page 1 / Lines 1-3               | Title                         |
| Key Words | 2      | 2 to 5 key words that identify diagnoses or interventions in this case report, including "case report"                                                | Page 2 / Lines 44-45             | Keywords                      |
| Abstract  | 3a     | Background: state what is known and unknown; why the case report is unique and what it adds to existing literature                                    | Page 1 / Lines 17-23             | Abstract – Background         |
|           | 3b     | Case Description: describe the patient's demographic details, main symptoms, history, important clinical findings, the main diagnosis, interventions, | Page 1 & 2/ Lines 24-37          | Abstract – Case Presentation  |

|                       |    |                                                                                              |                                                                 |                       |
|-----------------------|----|----------------------------------------------------------------------------------------------|-----------------------------------------------------------------|-----------------------|
|                       |    | outcomes and follow-ups                                                                      |                                                                 |                       |
|                       | 3c | Conclusions: summarize the main take-away lesson, clinical impact and potential implications | Page 2 / Lines 38-43                                            | Abstract – Conclusion |
| Introduction          | 4  | Why this case is unique (may include references)                                             | Page 2 / Lines 48-69                                            | Introduction          |
| Patient Information   | 5a | De-identified patient specific information                                                   | Page 3 / Lines 71                                               | Case presentation     |
|                       | 5b | Primary concerns and symptoms of the patient                                                 | Page 3 / Lines 71-72                                            | Case presentation     |
|                       | 5c | Medical, family, and psycho-social history including relevant genetic information            | Page 3 / Lines 79-80                                            | Case presentation     |
|                       | 5d | Relevant past interventions with outcomes                                                    | Page 3 / Lines 75-79                                            | Case presentation     |
| Clinical Findings     | 6  | Describe significant physical examination (PE) and important clinical findings               | Page 3/ Lines 81-94                                             | Case presentation     |
| Timeline              | 7  | Historical and current information from this episode of care organized as a timeline         | Page 3-4 / Lines 75-79, 71-75, 81-82, 95-109, 110-115, 132-1134 | Case presentation     |
| Diagnostic Assessment | 8a | Diagnostic testing (such as PE, laboratory                                                   | Page 3 & 4/ Lines 95-115                                        | Case presentation     |

|                          |     |                                                                                            |                        |                                                |
|--------------------------|-----|--------------------------------------------------------------------------------------------|------------------------|------------------------------------------------|
|                          |     | testing, imaging, surveys)                                                                 |                        |                                                |
|                          | 8b  | Diagnostic challenges (such as access to testing, financial, or cultural)                  | Page 4 / Lines 113-115 | Case presentation                              |
|                          | 8c  | Diagnosis (including other diagnoses considered)                                           | Page 4/ Lines 116-126  | Case presentation                              |
|                          | 8d  | Prognosis (such as staging in oncology) where applicable                                   | N/A                    | N/A                                            |
| Therapeutic Intervention | 9a  | Types of therapeutic intervention (such as pharmacologic, surgical, preventive, self-care) | Page 4 / Lines 127-131 | Case presentation                              |
|                          | 9b  | Administration of therapeutic intervention (such as dosage, strength, duration)            | Page 4 / Lines 127-131 | Case presentation                              |
|                          | 9c  | Changes in therapeutic intervention (with rationale)                                       | N/A                    | N/A – no changes to the intervention were made |
| Follow-up & Outcomes     | 10a | Clinician and patient-assessed outcomes (if available)                                     | Page 4 / Lines 132-134 | Case presentation                              |
|                          | 10b | Important follow-up diagnostic and other test results                                      | Page 4 / Lines 132-134 | Case presentation                              |
|                          | 10c | Intervention adherence and                                                                 | N/A                    | N/A                                            |

|                     |     | tolerability (How was this assessed?)                                                                 |                                     |                                                                                  |
|---------------------|-----|-------------------------------------------------------------------------------------------------------|-------------------------------------|----------------------------------------------------------------------------------|
|                     | 10d | Adverse and unanticipated events                                                                      | N/A                                 | N/A – no adverse events to treatment reported                                    |
| Discussion          | 11a | A scientific discussion of the strengths AND limitations associated with this case report             | Page 5 & 6 / Lines 174-199          | Limitations                                                                      |
|                     | 11b | Discussion of the relevant medical literature with references                                         | Page 4 & 5 / Lines 136-165          | Discussion                                                                       |
|                     | 11c | The scientific rationale for any conclusions (including assessment of possible causes)                | Page 4 & 5 / Lines 139-150, 160-165 | Discussion                                                                       |
|                     | 11d | The primary "take-away" lessons of this case report (without references) conclusion                   | Page 6 / Lines 201-214              | Conclusion                                                                       |
| Patient Perspective | 12  | The patient should share their perspective in one to two paragraphs on the treatment(s) they received | N/A                                 | N/A – patient perspective was not collected in a format suitable for publication |
| Informed Consent    | 13  | Did the patient give informed consent? Please provide if requested                                    | Yes, Page 6 / Lines 216-218         | Consent for publication                                                          |
